# Supplementary figures and images for: Complexity-Adjusted Learning Curves for Robotic and Laparoscopic Liver Resection: A Word of Caution
Source: PubMed Central journal article supplement — Ann Surg Open. 2022 Jan 25;3(1):e131. doi: 10.1097/AS9.0000000000000131 (PMC10431481; doi:10.1097/as9.0000000000000131), 2022-01-25

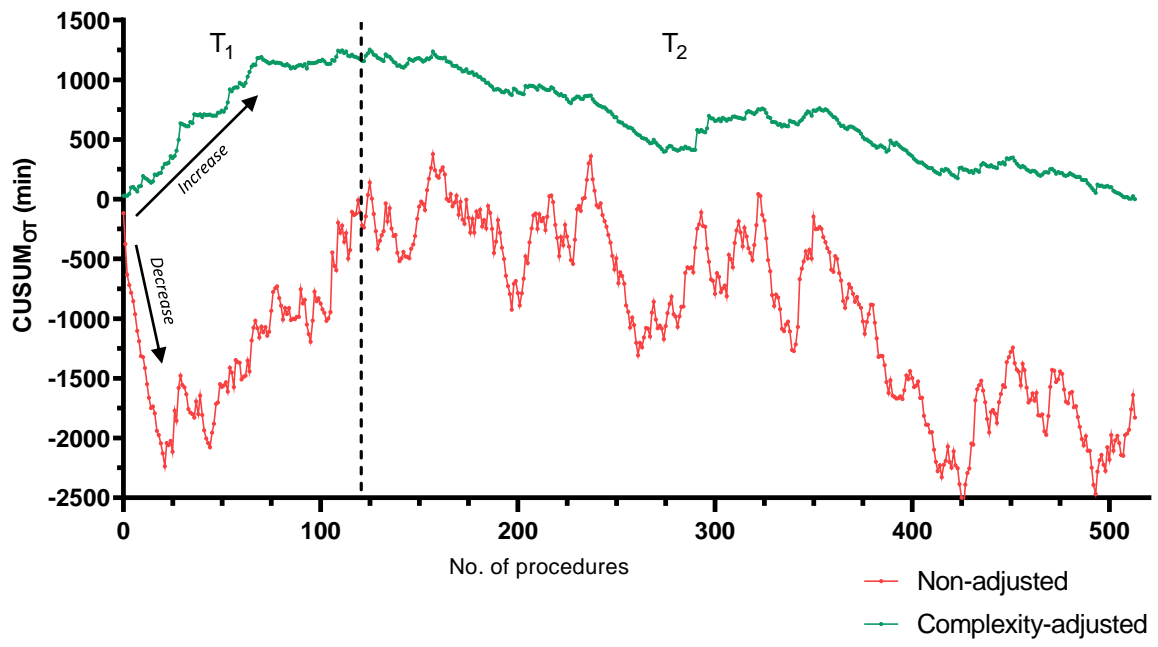

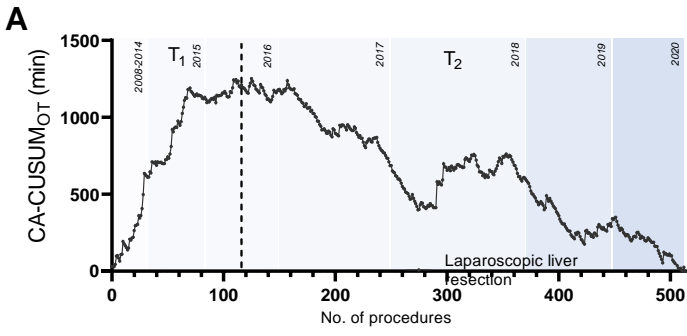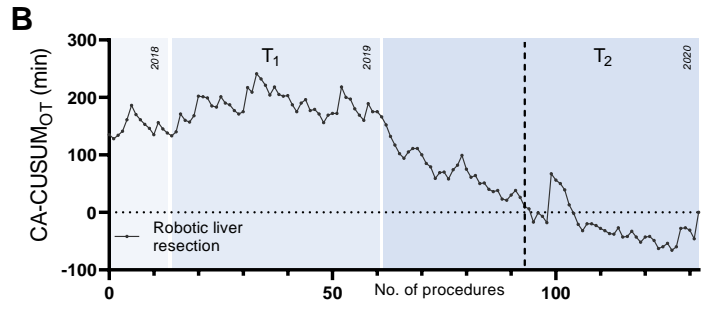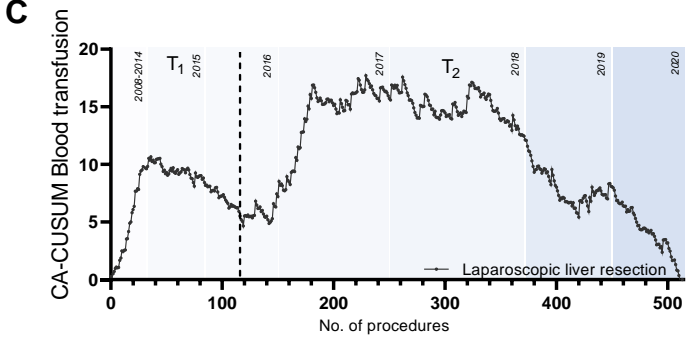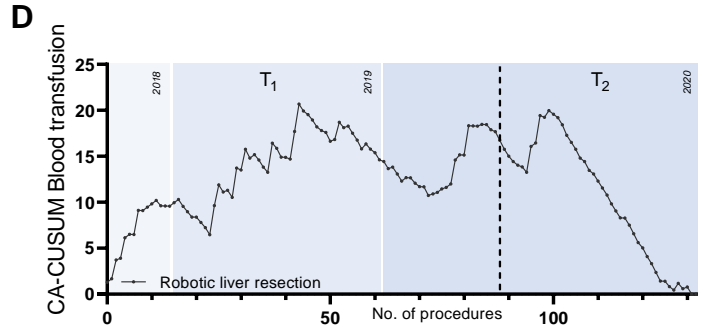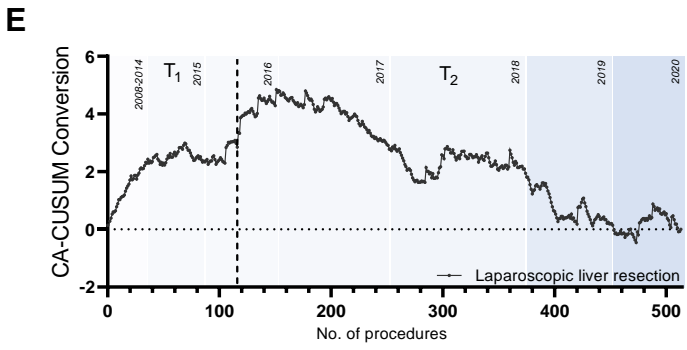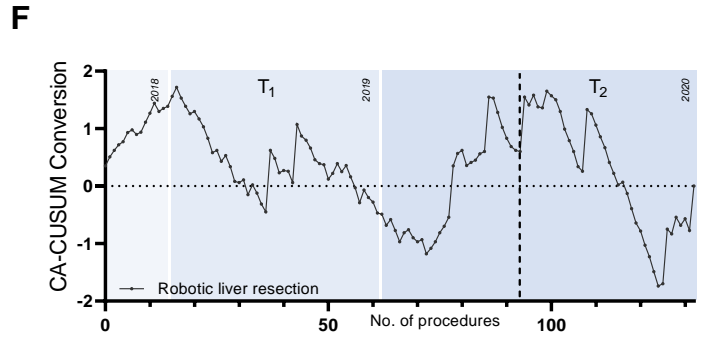

Supplement: as9-3-e131-s001.pdf [file as9-3-e131-s001.pdf]
